# Supplementary material for: Therapeutic Effects of Human Mesenchymal Stem Cells in a Mouse Model of Cerebellar Ataxia with Neuroinflammation
Source: MDPI journal article supplement (doi:10.3390/jcm9113654), 2020-11-13
Supplement: s1 [file s1]

## Supplementary Materials

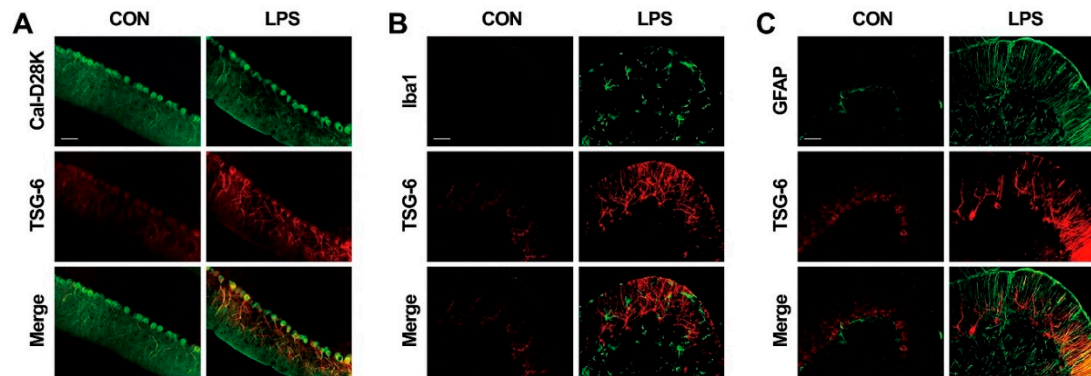

**Figure 1.** TSG-6 upregulation in the LPS-exposed cerebellum. **(A-C)** The expression patterns of TSG-6 (red) and various cerebellar cells (green), including Purkinje cells **(A)**, microglia **(B)**, and astrocytes **(C)**, 7 days after LPS treatment in the cerebellum of a mouse's brain. TSG-6 expression increased in the cerebellum after LPS injection and mainly colocalized with astrocytes and Purkinje cells. Scale bar = 50  $\mu$ m.
